# Supplementary material
Source: publisher site journal article supplement (https://www.spandidos-publications.com/7486/downloadSupplementary)
Supplement: Supplementary file 1 [file downloadSupplementary]

## Sheet: Sheet1
Table SI. Top100 tRNA modification-associated genes from the Molecular Signatures Database.
tRNA modification genes (1-50)	tRNA modification genes (51-100)
AARS1	PUS1
ADAT1	PUS10
ADAT2	PUS3
ADAT3	PUS7
AKT1	PUSL1
ALKBH1	PRORP
ALKBH8	QTRT1
ANKRD16	QTRT2
BCDIN3D	RPUSD4
C9orf64	SARS1
CDK5RAP1	SEPSECS
CDKAL1	SSB
CTU1	TARBP1
CTU2	THADA
DALRD3	THG1L
DPH3	THUMPD1
DTWD1	THUMPD2
DTWD2	THUMPD3
DUS1L	TPRKB
DUS2	TP53RK
DUS3L	TRDMT1
DUS4L	TRIT1
ELP1	TRMO
ELP2	TRMT1
ELP3	TRMT10A
ELP4	TRMT10B
ELP5	TRMT10C
ELP6	TRMT11
EPRS1	TRMT112
FTSJ1	TRMT12
GON7	TRMT13
GTPBP3	TRMT1L
HSD17B10	TRMT2A
KTI12	TRMT2B
LAGE3	TRMT44
LCMT2	TRMT5
METTL1	TRMT6
METTL2A	TRMT61A
METTL2B	TRMT61B
METTL6	TRMT9B
METTL8	TRMU
MOCS3	TRUB1
MTFMT	TYW1
MTO1	TYW1B
NAT10	TYW3
NSUN2	TYW5
NSUN3	URM1
NSUN6	WDR4
OSGEP	WDR6
OSGEPL1	YRDC
tRNA, transfer RNA.
Table SⅡ. Reference gene accession numbers used for primer design
Gene	Accession no.
GAPDH	NM_001256799.3
FTSJ1	NM_001282157.1
LCMT2	NM_014793.5
METTL6	NM_001301790.2
PUS1	NM_001002019.3
TRMO	NM_001330725.2
TRMT5	NM_001350253.1
FTSJ1, FtsJ RNA 2’-O-methyltransferase 1; LCMT2, leucine carboxyl methyltransferase 2; METTL6, methyltransferase-like protein 6; PUS1, pseudouridine synthase 1; TRMO, TRNA methyltransferase O; TRMT5, TRNA methyltransferase 5.
Table SⅢ. Primer sequences.
Gene	Sequence (5’-3’)
FTSJ1	F: TGGCCAAGATATTCCGAGGC
	R: TTGTCTTCCATCTCAGGGGC
LCMT2	F: CAGCGTAGTCAGTAGCGAGG
	R: TCCTGACCCAAGCCATTGTC
METTL6	F: GCAGGCAAGGATTCTCACCT
	R: GCTGAGCCAGGAAGTCATCA
PUS1	F: GGGCGGGTTTAACTCCAAGA
	R: ATGTGCTCCTCCTTGAAGGC
TRMO	F: CCGCAAAATGTGATGGAGCC
	R: GTCCATCTCGGCATGAGGAG
TRMT5	F: GACCCACATCCGATCGGTAC
	R: ACCTTCAGGAAGCACAGCTC
GAPDH	F: ACTTGGTATCGTGGAAGGACTC
	R: GTAGAGGCAGGGATGATGTTCTG
F, forward; R, reverse; FTSJ1, FtsJ RNA 2’-O-methyltransferase 1; LCMT2, leucine carboxyl methyltransferase 2; METTL6, methyltransferase-like protein 6; PUS1, pseudouridine synthase 1; TRMO, TRNA methyltransferase O; TRMT5, TRNA methyltransferase 5.
Table SIV. The contents of these 24 genes
6 protective factors	18 risk factors
LCMT2	ANKRD16
SEPSECS	CDK5RAP1
TRMO	CTU1
TRMT1L	CTU2
TRMT5	DUS1L
TRMT61B	FTSJ1
	GTPBP3
	METTL6
	LCMT2
	NSUN6
	OSGEP
	PUS1
	PUSL1
	QTRT1
	TARBP1
	TRIT1
	TRMT1
	TRMU
Table SⅤ. The contents represented by clusters 1 and 2.
Cluster 1	Cluster 2
TCGA-CZ-4853 1	TCGA-AK-3447 2
TCGA-B0-5700 1	TCGA-AK-3458 2
TCGA-CJ-4899 1	TCGA-B0-5107 2
TCGA-BP-4343 1	TCGA-G6-A8L6 2
TCGA-B0-5097 1	TCGA-B0-4718 2
TCGA-BP-4330 1	TCGA-B0-4706 2
TCGA-AK-3451 1	TCGA-CZ-5468 2
TCGA-6D-AA2E 1	TCGA-B0-4698 2
TCGA-A3-3374 1	TCGA-CJ-4900 2
TCGA-CJ-4916 1	TCGA-CJ-4642 2
TCGA-BP-4961 1	TCGA-B0-4713 2
TCGA-BP-4344 1	TCGA-BP-4335 2
TCGA-B2-4101 1	TCGA-B0-4849 2
TCGA-CJ-6033 1	TCGA-B0-5702 2
TCGA-A3-3343 1	TCGA-CJ-5679 2
TCGA-DV-5567 1	TCGA-B0-4811 2
TCGA-BP-4798 1	TCGA-B0-4841 2
TCGA-BP-4964 1	TCGA-BP-4969 2
TCGA-B0-4852 1	TCGA-B0-5109 2
TCGA-B8-4146 1	TCGA-B0-4833 2
TCGA-CZ-4859 1	TCGA-CZ-4854 2
TCGA-EU-5905 1	TCGA-BP-4342 2
TCGA-CZ-5458 1	TCGA-CJ-4882 2
TCGA-AK-3443 1	TCGA-B0-4844 2
TCGA-CJ-4918 1	TCGA-B0-4691 2
TCGA-CZ-5466 1	TCGA-BP-4981 2
TCGA-B4-5832 1	TCGA-MM-A563 2
TCGA-A3-3347 1	TCGA-CJ-4881 2
TCGA-BP-4162 1	TCGA-B0-4696 2
TCGA-CJ-4895 1	TCGA-B0-4822 2
TCGA-CJ-4892 1	TCGA-B0-5098 2
TCGA-CW-5588 1	TCGA-BP-5185 2
TCGA-BP-5192 1	TCGA-BP-5001 2
TCGA-B8-A54F 1	TCGA-G6-A8L7 2
TCGA-B0-4839 1	TCGA-CJ-4875 2
TCGA-BP-5006 1	TCGA-CJ-4638 2
TCGA-B0-5075 1	TCGA-BP-4992 2
TCGA-CJ-4640 1	TCGA-BP-4761 2
TCGA-B0-5113 1	TCGA-B8-4143 2
TCGA-B2-3923 1	TCGA-B0-4714 2
TCGA-BP-4167 1	TCGA-AK-3445 2
TCGA-DV-A4W0 1	TCGA-CJ-4878 2
TCGA-B0-5703 1	TCGA-B8-A7U6 2
TCGA-CZ-5465 1	TCGA-DV-A4VX 2
TCGA-A3-3329 1	TCGA-BP-4351 2
TCGA-B0-4818 1	TCGA-A3-3383 2
TCGA-CZ-5986 1	TCGA-BP-4776 2
TCGA-AK-3440 1	TCGA-B8-A54I 2
TCGA-AS-3778 1	TCGA-B0-4712 2
TCGA-B0-4838 1	TCGA-B0-4819 2
TCGA-BP-5199 1	TCGA-B0-4810 2
TCGA-B8-4151 1	TCGA-B0-4821 2
TCGA-EU-5907 1	TCGA-A3-A8OV 2
TCGA-BP-4161 1	TCGA-BP-5010 2
TCGA-CJ-4643 1	TCGA-BP-4971 2
TCGA-CJ-5684 1	TCGA-B0-4688 2
TCGA-A3-A6NL 1	TCGA-CJ-4923 2
TCGA-B0-5116 1	TCGA-BP-5175 2
TCGA-A3-3324 1	TCGA-BP-4355 2
TCGA-BP-5007 1	TCGA-DV-A4VZ 2
TCGA-BP-4975 1	TCGA-G6-A8L8 2
TCGA-B0-5711 1	TCGA-B0-4828 2
TCGA-CZ-5467 1	TCGA-BP-4988 2
TCGA-B0-4707 1	TCGA-AK-3454 2
TCGA-B0-5691 1	TCGA-BP-4341 2
TCGA-B0-5120 1	TCGA-BP-4989 2
TCGA-CZ-5461 1	TCGA-B0-4817 2
TCGA-A3-3362 1	TCGA-BP-5169 2
TCGA-B4-5834 1	TCGA-AK-3453 2
TCGA-BP-4173 1	TCGA-BP-4960 2
TCGA-AK-3425 1	TCGA-B0-4847 2
TCGA-BP-4169 1	TCGA-G6-A5PC 2
TCGA-B8-5159 1	TCGA-B0-5092 2
TCGA-B2-3924 1	TCGA-BP-5191 2
TCGA-B0-5399 1	TCGA-BP-5170 2
TCGA-BP-4354 1	TCGA-AK-3427 2
TCGA-BP-5198 1	TCGA-BP-4327 2
TCGA-BP-5183 1	TCGA-B0-5085 2
TCGA-CW-6088 1	TCGA-B0-4815 2
TCGA-A3-3365 1	TCGA-BP-4334 2
TCGA-CJ-4870 1	TCGA-B0-4697 2
TCGA-B8-A54J 1	TCGA-CJ-4912 2
TCGA-CZ-4863 1	TCGA-A3-3346 2
TCGA-DV-5573 1	TCGA-MM-A564 2
TCGA-BP-4763 1	TCGA-B0-5088 2
TCGA-CJ-6030 1	TCGA-BP-4165 2
TCGA-CZ-5452 1	TCGA-CJ-4873 2
TCGA-A3-3370 1	TCGA-BP-4352 2
TCGA-CJ-5682 1	TCGA-B0-5084 2
TCGA-BP-5181 1	TCGA-CZ-5469 2
TCGA-CZ-5984 1	TCGA-B0-4845 2
TCGA-AK-3461 1	TCGA-MM-A84U 2
TCGA-BP-4158 1	TCGA-BP-5201 2
TCGA-CW-5590 1	TCGA-AK-3426 2
TCGA-CJ-4635 1	TCGA-CJ-4891 2
TCGA-BP-5174 1
TCGA-BP-4998 1
TCGA-DV-5568 1
TCGA-B8-5546 1
TCGA-CZ-5982 1
TCGA-B0-4837 1
TCGA-BP-5195 1
TCGA-BP-5004 1
TCGA-CZ-5988 1
TCGA-A3-3320 1
TCGA-CJ-5678 1
TCGA-BP-5178 1
TCGA-CZ-5454 1
TCGA-B0-5709 1
TCGA-CJ-4897 1
TCGA-BP-5008 1
TCGA-CZ-4857 1
TCGA-B4-5838 1
TCGA-CJ-5686 1
TCGA-CJ-4903 1
TCGA-BP-4991 1
TCGA-BP-4967 1
TCGA-A3-3311 1
TCGA-B2-5639 1
TCGA-CJ-4886 1
TCGA-B8-4622 1
TCGA-A3-3358 1
TCGA-AK-3428 1
TCGA-BP-4789 1
TCGA-B0-5696 1
TCGA-B0-5117 1
TCGA-BP-4766 1
TCGA-B0-5096 1
TCGA-B0-5694 1
TCGA-A3-3359 1
TCGA-CJ-4907 1
TCGA-A3-3316 1
TCGA-B8-4154 1
TCGA-B2-5633 1
TCGA-CJ-5677 1
TCGA-B0-5698 1
TCGA-CJ-5680 1
TCGA-DV-5569 1
TCGA-BP-4803 1
TCGA-A3-3378 1
TCGA-BP-5189 1
TCGA-B0-4694 1
TCGA-BP-4993 1
TCGA-B0-5077 1
TCGA-BP-4784 1
TCGA-B0-5699 1
TCGA-CJ-5676 1
TCGA-CJ-4639 1
TCGA-CJ-6028 1
TCGA-CJ-6027 1
TCGA-A3-3349 1
TCGA-CW-6097 1
TCGA-CJ-4872 1
TCGA-CJ-5672 1
TCGA-CJ-4871 1
TCGA-BP-5182 1
TCGA-B8-A54H 1
TCGA-BP-4164 1
TCGA-BP-4976 1
TCGA-B0-5100 1
TCGA-A3-3331 1
TCGA-AK-3450 1
TCGA-DV-5574 1
TCGA-B0-5108 1
TCGA-A3-3387 1
TCGA-B0-4848 1
TCGA-B8-5158 1
TCGA-GK-A6C7 1
TCGA-BP-4983 1
TCGA-AK-3436 1
TCGA-BP-4329 1
TCGA-BP-4799 1
TCGA-B2-5641 1
TCGA-BP-4977 1
TCGA-BP-4790 1
TCGA-BP-4775 1
TCGA-A3-3335 1
TCGA-BP-4970 1
TCGA-BP-4974 1
TCGA-CZ-5987 1
TCGA-B4-5378 1
TCGA-AK-3431 1
TCGA-BP-4768 1
TCGA-A3-3385 1
TCGA-B0-5713 1
TCGA-B0-4842 1
TCGA-BP-4962 1
TCGA-B8-4153 1
TCGA-BP-4801 1
TCGA-B2-4102 1
TCGA-CZ-5455 1
TCGA-A3-3357 1
TCGA-EU-5904 1
TCGA-AS-3777 1
TCGA-CW-5584 1
TCGA-CJ-4902 1
TCGA-AK-3433 1
TCGA-BP-4345 1
TCGA-A3-3306 1
TCGA-MW-A4EC 1
TCGA-BP-4986 1
TCGA-CZ-5460 1
TCGA-CW-6087 1
TCGA-A3-3317 1
TCGA-CJ-4868 1
TCGA-B0-4690 1
TCGA-AK-3456 1
TCGA-B0-5080 1
TCGA-T7-A92I 1
TCGA-CJ-4890 1
TCGA-B0-4827 1
TCGA-B0-5701 1
TCGA-B0-4693 1
TCGA-CW-5591 1
TCGA-A3-3373 1
TCGA-BP-5176 1
TCGA-CZ-5462 1
TCGA-B2-A4SR 1
TCGA-BP-5009 1
TCGA-BP-4353 1
TCGA-CW-5585 1
TCGA-CZ-5457 1
TCGA-CJ-4634 1
TCGA-BP-4163 1
TCGA-B8-4620 1
TCGA-B0-5710 1
TCGA-B0-5102 1
TCGA-CJ-5671 1
TCGA-B8-4621 1
TCGA-B8-5553 1
TCGA-CZ-5989 1
TCGA-CZ-5456 1
TCGA-B0-5812 1
TCGA-CZ-4864 1
TCGA-BP-5173 1
TCGA-A3-3326 1
TCGA-BP-4769 1
TCGA-A3-3367 1
TCGA-BP-4965 1
TCGA-A3-A6NJ 1
TCGA-AK-3465 1
TCGA-BP-4331 1
TCGA-CJ-4644 1
TCGA-B8-A54G 1
TCGA-CW-5583 1
TCGA-CW-5587 1
TCGA-BP-5186 1
TCGA-BP-4781 1
TCGA-B0-5115 1
TCGA-CW-5580 1
TCGA-BP-4325 1
TCGA-B0-4836 1
TCGA-DV-5576 1
TCGA-B0-5094 1
TCGA-CJ-4889 1
TCGA-A3-3376 1
TCGA-CJ-4884 1
TCGA-CJ-4908 1
TCGA-BP-4349 1
TCGA-B0-4703 1
TCGA-BP-5177 1
TCGA-B0-4816 1
TCGA-AK-3460 1
TCGA-A3-A8OW 1
TCGA-CZ-5985 1
TCGA-CJ-4904 1
TCGA-BP-5187 1
TCGA-BP-5196 1
TCGA-BP-4759 1
TCGA-B0-5083 1
TCGA-CJ-4905 1
TCGA-BP-5200 1
TCGA-DV-5575 1
TCGA-CZ-4866 1
TCGA-B0-4843 1
TCGA-CJ-4876 1
TCGA-CW-5589 1
TCGA-B0-4824 1
TCGA-A3-A6NI 1
TCGA-B8-A54K 1
TCGA-BP-4994 1
TCGA-CZ-5451 1
TCGA-CZ-5459 1
TCGA-BP-4774 1
TCGA-CJ-6032 1
TCGA-BP-4985 1
TCGA-CJ-5683 1
TCGA-BP-4795 1
TCGA-A3-3307 1
TCGA-CZ-4860 1
TCGA-AK-3455 1
TCGA-BP-5190 1
TCGA-BP-4177 1
TCGA-BP-4995 1
TCGA-B0-5692 1
TCGA-BP-5168 1
TCGA-B0-4823 1
TCGA-B8-5552 1
TCGA-BP-4797 1
TCGA-CJ-5681 1
TCGA-B0-5110 1
TCGA-BP-4777 1
TCGA-BP-4762 1
TCGA-B0-4700 1
TCGA-EU-5906 1
TCGA-CJ-4888 1
TCGA-B0-4814 1
TCGA-AK-3434 1
TCGA-CZ-4862 1
TCGA-B0-5400 1
TCGA-B0-4710 1
TCGA-B0-4846 1
TCGA-BP-4771 1
TCGA-CJ-4869 1
TCGA-CJ-4637 1
TCGA-BP-4804 1
TCGA-BP-4972 1
TCGA-CJ-4901 1
TCGA-A3-3380 1
TCGA-CJ-4885 1
TCGA-CJ-6031 1
TCGA-B0-4699 1
TCGA-BP-4340 1
TCGA-B0-5697 1
TCGA-BP-5194 1
TCGA-BP-4756 1
TCGA-BP-4346 1
TCGA-B4-5836 1
TCGA-A3-3351 1
TCGA-A3-3313 1
TCGA-DV-5566 1
TCGA-B0-5099 1
TCGA-CZ-5464 1
TCGA-B2-5635 1
TCGA-BP-4963 1
TCGA-BP-4160 1
TCGA-B0-5712 1
TCGA-CJ-4893 1
TCGA-BP-4987 1
TCGA-DV-5565 1
TCGA-A3-3323 1
TCGA-CZ-5463 1
TCGA-3Z-A93Z 1
TCGA-CJ-5675 1
TCGA-BP-4760 1
TCGA-BP-4174 1
TCGA-B4-5377 1
TCGA-A3-3372 1
TCGA-B0-5119 1
TCGA-BP-4973 1
TCGA-B0-5705 1
TCGA-CZ-4861 1
TCGA-B8-5550 1
TCGA-BP-4326 1
TCGA-BP-4782 1
TCGA-BP-4347 1
TCGA-B0-5695 1
TCGA-B8-5545 1
TCGA-AK-3429 1
TCGA-BP-4765 1
TCGA-BP-4170 1
TCGA-B2-4098 1
TCGA-BP-4332 1
TCGA-B8-A54D 1
TCGA-B0-4701 1
TCGA-BP-5180 1
TCGA-B8-5549 1
TCGA-A3-3325 1
TCGA-A3-3322 1
TCGA-CJ-4636 1
TCGA-A3-3352 1
TCGA-BP-4968 1
TCGA-BP-4982 1
TCGA-CW-6093 1
TCGA-A3-3363 1
TCGA-B8-A8YJ 1
TCGA-BP-4176 1
TCGA-BP-4959 1
TCGA-CJ-4641 1
TCGA-CZ-4865 1
TCGA-BP-5184 1
TCGA-B8-4148 1
TCGA-CZ-4858 1
TCGA-B0-5121 1
TCGA-B0-5402 1
TCGA-A3-3319 1
TCGA-BP-4999 1
TCGA-CW-6090 1
TCGA-B0-5693 1
TCGA-BP-4159 1
TCGA-B0-5706 1
TCGA-CW-5581 1
TCGA-CJ-4874 1
TCGA-A3-3382 1
TCGA-CJ-4887 1
TCGA-B0-5106 1
TCGA-B2-4099 1
TCGA-B0-4945 1
TCGA-BP-4807 1
TCGA-BP-4758 1
TCGA-BP-5000 1
TCGA-CJ-4894 1
TCGA-B0-5690 1
TCGA-CJ-4920 1
TCGA-BP-4770 1
TCGA-B0-4834 1
TCGA-B0-5095 1
TCGA-B0-5707 1
TCGA-BP-4338 1
TCGA-BP-4787 1
TCGA-A3-3328 1
TCGA-B8-A54E 1
TCGA-B0-5081 1
TCGA-B2-5636 1
TCGA, the Cancer Genome Atlas.
